# Supplementary material for: Safety and efficacy of nusinersen in spinal muscular atrophy: The EMBRACE study
Source: PubMed Central journal article supplement — Muscle Nerve. 2021 Feb 16;63(5):668–77. doi: 10.1002/mus.27187 (PMC8248061; doi:10.1002/mus.27187), 2021-02-16
Supplement: MUS-63-668-s001.pdf [file MUS-63-668-s001.pdf]

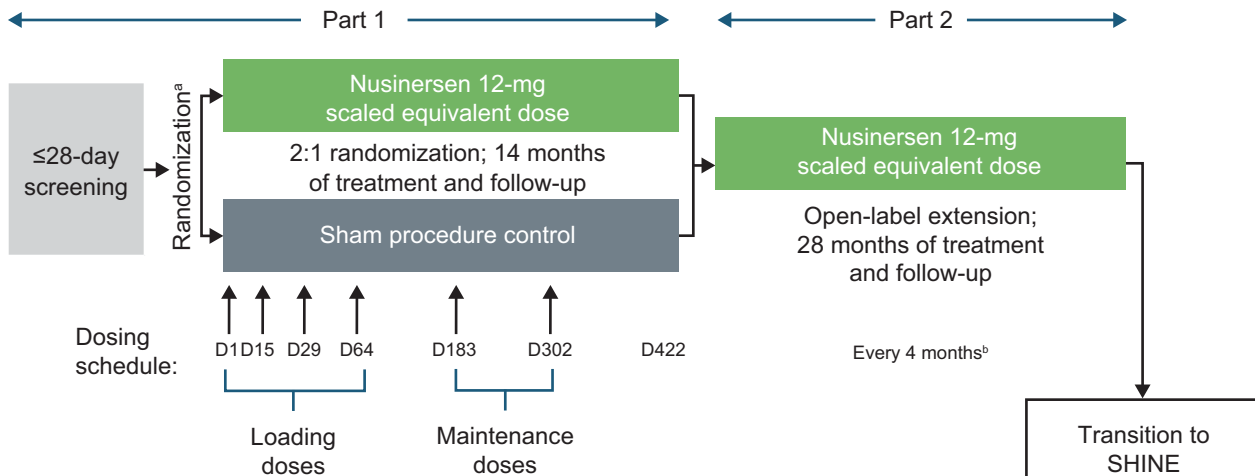

| Key inclusion criteria for Part 1                                                                                                                                                                                                                                                                                                                                                                                                                                                                                                                                               | Key exclusion criteria for Part 1 <sup>c</sup>                                                                                                            |
|---------------------------------------------------------------------------------------------------------------------------------------------------------------------------------------------------------------------------------------------------------------------------------------------------------------------------------------------------------------------------------------------------------------------------------------------------------------------------------------------------------------------------------------------------------------------------------|-----------------------------------------------------------------------------------------------------------------------------------------------------------|
| <ul style="list-style-type: none"> <li>Genetic documentation of 5q SMA homozygous gene deletion, mutation, or compound heterozygote</li> </ul>                                                                                                                                                                                                                                                                                                                                                                                                                                  | <ul style="list-style-type: none"> <li>Ventilator use <math>\geq 16</math> hours/day for <math>&gt;21</math> days at screening</li> </ul>                 |
| <ul style="list-style-type: none"> <li>Onset of SMA symptoms at <math>\leq 6</math> months with 3 <i>SMN2</i> copies</li> </ul> <p style="text-align: center;"><b>OR</b></p> <ul style="list-style-type: none"> <li>Onset of SMA symptoms at <math>\leq 6</math> months, <math>&gt;7</math> months at screening, and 2 <i>SMN2</i> copies</li> </ul> <p style="text-align: center;"><b>OR</b></p> <ul style="list-style-type: none"> <li>Onset of SMA symptoms at <math>&gt;6</math> months, <math>\leq 18</math> months at screening, and 2 or 3 <i>SMN2</i> copies</li> </ul> | <ul style="list-style-type: none"> <li>Hospitalization for surgery, pulmonary event, or nutritional support within 2 months prior to screening</li> </ul> |

Transition to SHINE (NCT02594124); open-label extension study of nusinersen every 4 months for up to 5 years
