# Supplementary figures and images for: Safety and efficacy of nusinersen in spinal muscular atrophy: The EMBRACE study
Source: PubMed Central journal article supplement — Muscle Nerve. 2021 Feb 16;63(5):668–77. doi: 10.1002/mus.27187 (PMC8248061; doi:10.1002/mus.27187), 2021-02-16

**A****Nusinersen**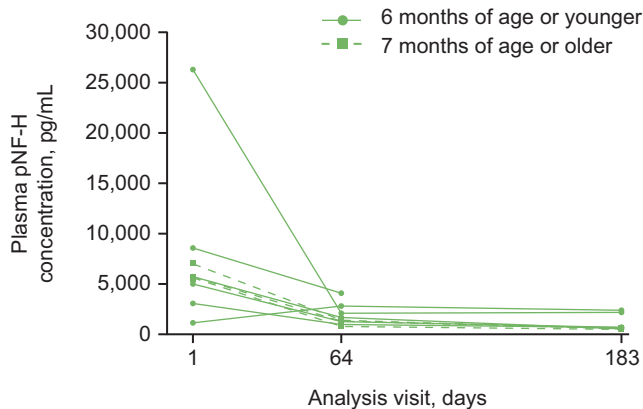**Sham procedure**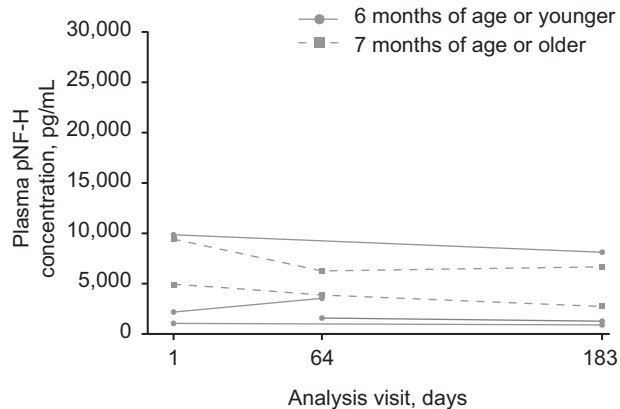**B**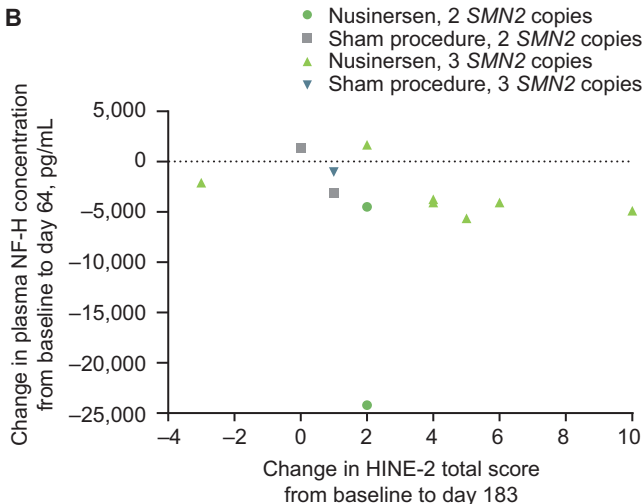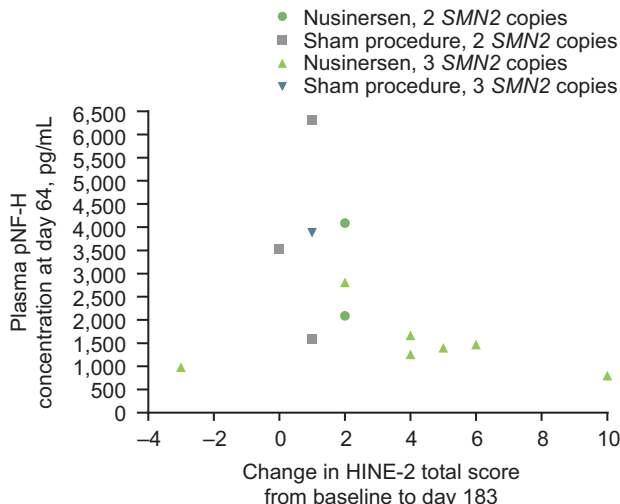

Supplement: MUS-63-668-s003.pdf [file MUS-63-668-s003.pdf]

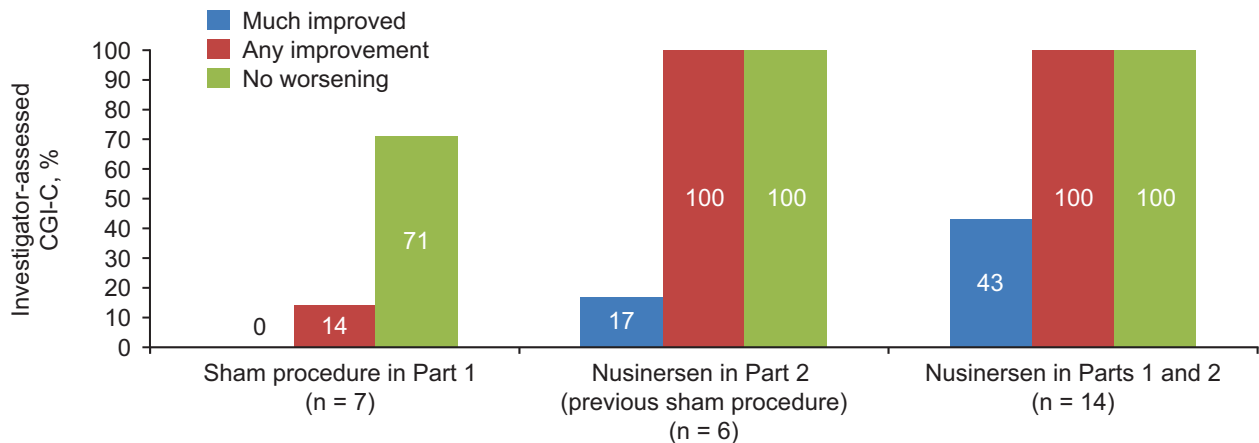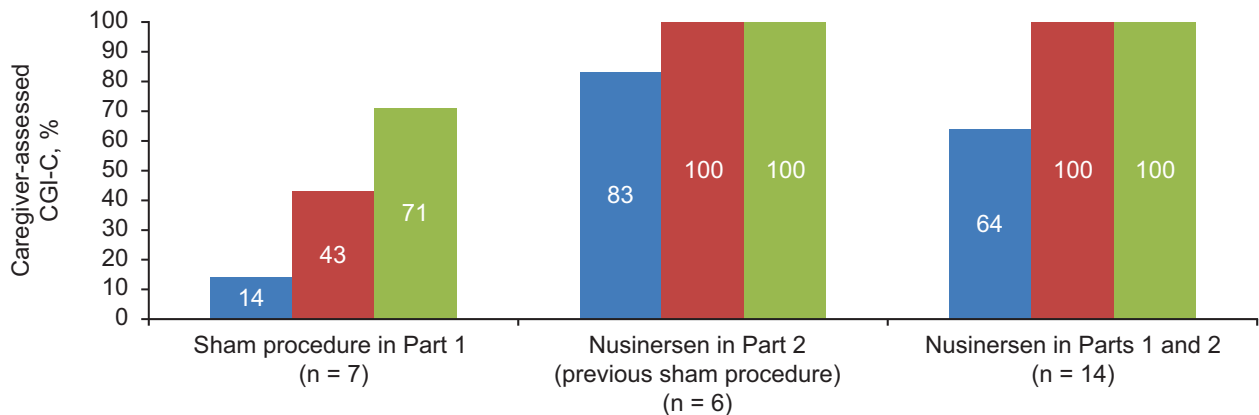

Supplement: MUS-63-668-s004.pdf [file MUS-63-668-s004.pdf]

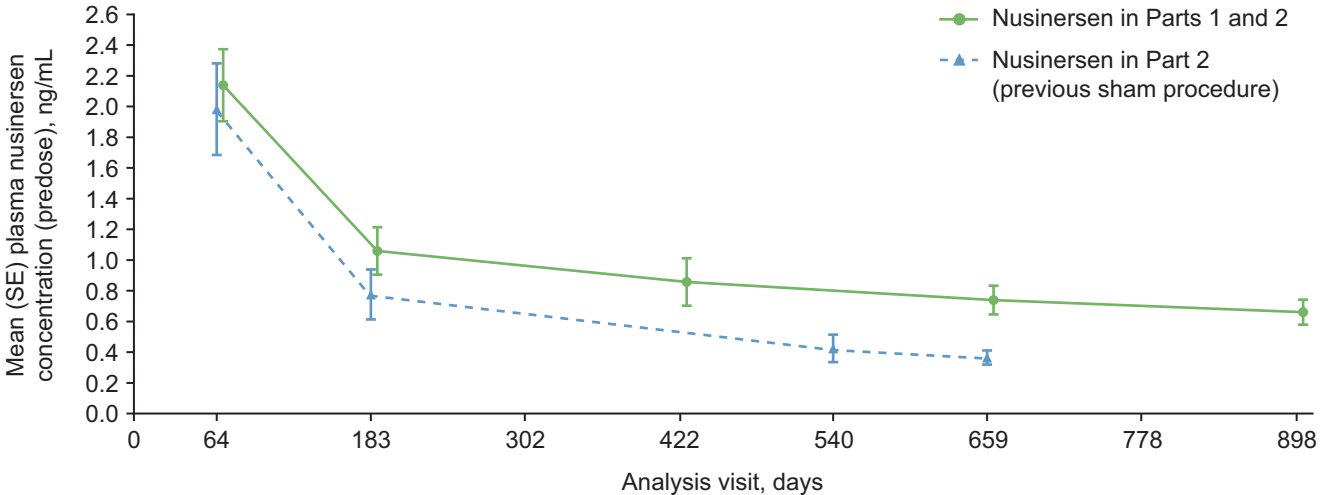

● 14      ● 13      ● 9      ● 9      ● 10

▲ 6      ▲ 6      ▲ 6      ▲ 6

Supplement: MUS-63-668-s006.pdf [file MUS-63-668-s006.pdf]
